# Supplementary material for: Phase junction crystalline carbon nitride nanosheets modified with CdS nanoparticles for photocatalytic CO2reduction
Source: Royal Society of Chemistry journal article supplement (doi:10.1039/d2se01576e), 2022-12-07
Supplement: d2se01576e1.pdf [file d2se01576e1.pdf]

## Electronic Supplementary Information

### Phase junction crystalline carbon nitride nanosheets modified with CdS nanoparticles for photocatalytic CO<sub>2</sub> reduction

Gongjie Chen<sup>‡</sup>, Fen Wei<sup>‡</sup>, Ziruo Zhou, Bo Su, Can Yang, Xue Feng Lu, Sibowang<sup>\*</sup>

and Xincheng Wang<sup>\*</sup>

State Key Laboratory of photocatalysis on Energy and Environment, College of Chemistry, Fuzhou  
University, Fujian, Fuzhou, 350002, China

\*Corresponding authors, E-mail: [sibowang@fzu.edu.cn](mailto:sibowang@fzu.edu.cn); [xcwang@fzu.edu.cn](mailto:xcwang@fzu.edu.cn)

<sup>‡</sup> Contributed equally.

## Experimental details

**Materials characterization.** Powder X-ray diffraction (XRD) tests were carried out on a Rigaku Miniflex 600 Advance X-ray instrument (Cu K $\alpha$  radiation,  $\lambda = 1.5406 \text{ \AA}$ ) at a voltage of 40 kV and a current of 40 mA. A Nicolet IS50 FTIR spectrometer (Thermo Scientific) was employed to collect the Fourier transform infrared (FTIR) spectra. Field-emission scanning electron microscope (FESEM; Hitachi SU 8010) and transmission electron microscope (TEM; Philips, Tecnai 20 FEI) were used to examine the morphology and structure of the samples. The compositions of the samples were determined by energy-dispersive X-ray spectroscopy (EDS) attached to transmission electron microscope (TEM; Philips, Tecnai 20 FEI) and inductively coupled plasma emission spectrometer (iCAP7400). X-ray photoelectron spectroscopy (XPS) analysis and Ultraviolet photoelectron spectra were carried out on a PHI Quantum 2000 XPS system with C 1s binding energy (284.8 eV) as the reference and He I excitation (21.22 eV) as the monochromatic light source. N<sub>2</sub> and CO<sub>2</sub> adsorption-desorption isotherms characterizations were conducted on a Micromeritics ASAP2020 under liquid nitrogen (77K) temperature and ice/water mixture temperature (273K), respectively. UV-vis diffuse reflectance spectra (DRS) were obtained using a Lambda 950 UV-vis spectrometer equipped with an integrating sphere, and BaSO<sub>4</sub> was used as a reference. The room temperature photoluminescence (PL) characterizations were carried out on Hitachi F-7000 spectrophotometer. The fluorescence lifetime is determined by recording the time-resolved fluorescence emission spectra on a Deltapro Fluorescence Lifetime System. The electrochemical analysis carried out on Metrohm Autolab Electrochemical System, using a conventional three electrodes cell with Pt electrode and Ag/AgCl electrode as the counter electrode and reference electrode, respectively. The transient photocurrent response spectra were collected in 0.2 M Na<sub>2</sub>SO<sub>4</sub> aqueous solution with a 300 W xenon lamp as a light source. The EIS were collected in 0.2 M Na<sub>2</sub>SO<sub>4</sub> aqueous solution without light, and testing frequency range from 10 mHz to 1000 KHz.

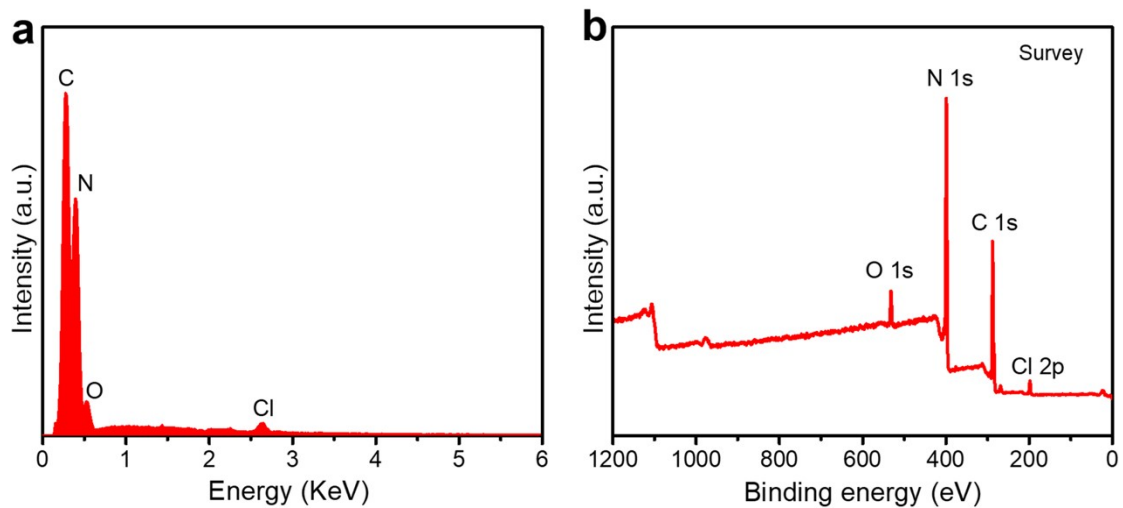

**Fig. S1** (a) EDX and (b) XPS survey spectra of CCN NSs.

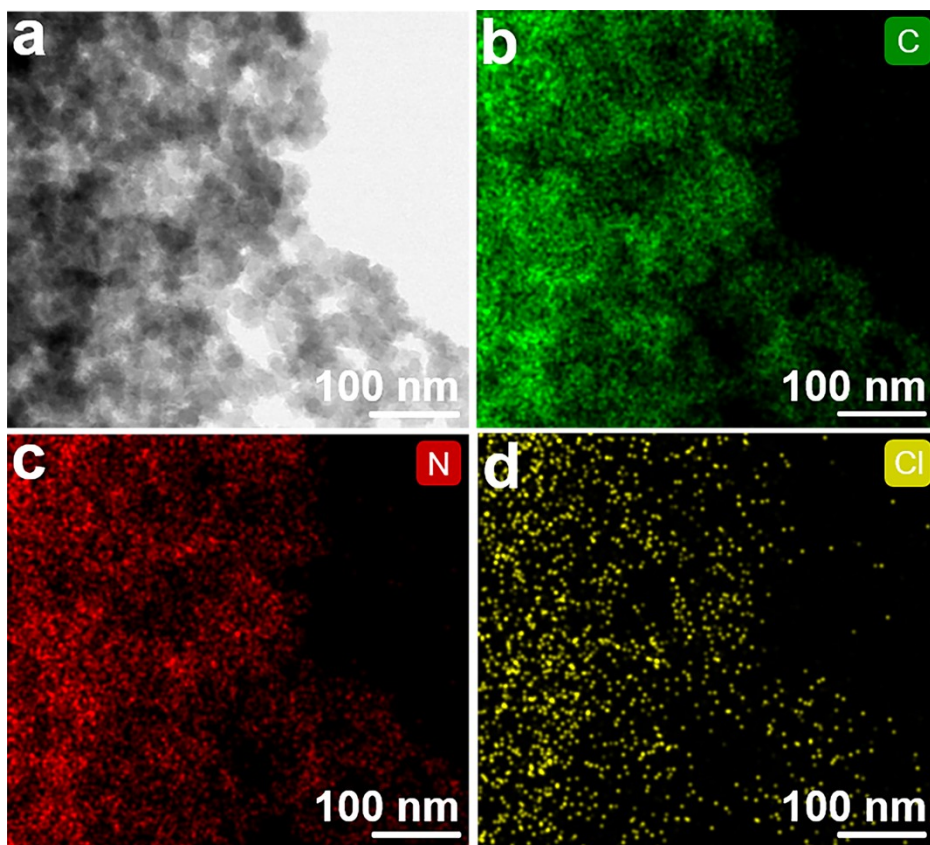

**Fig. S2** (a) TEM image, (b-d) elemental mapping images of CCN NSs.

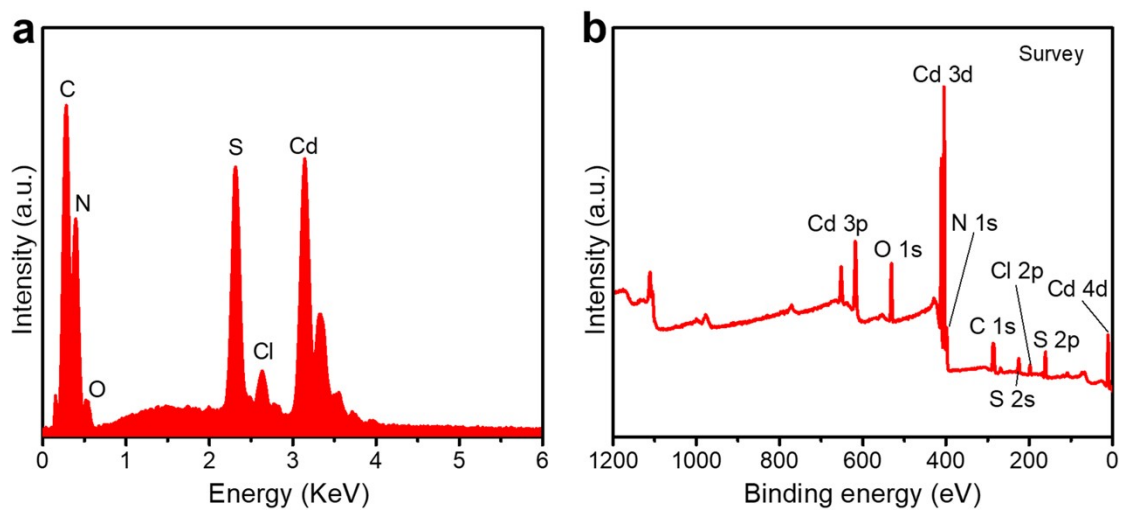

**Fig. S3** (a) EDX and (b) XPS survey spectra of CCN/CdS.

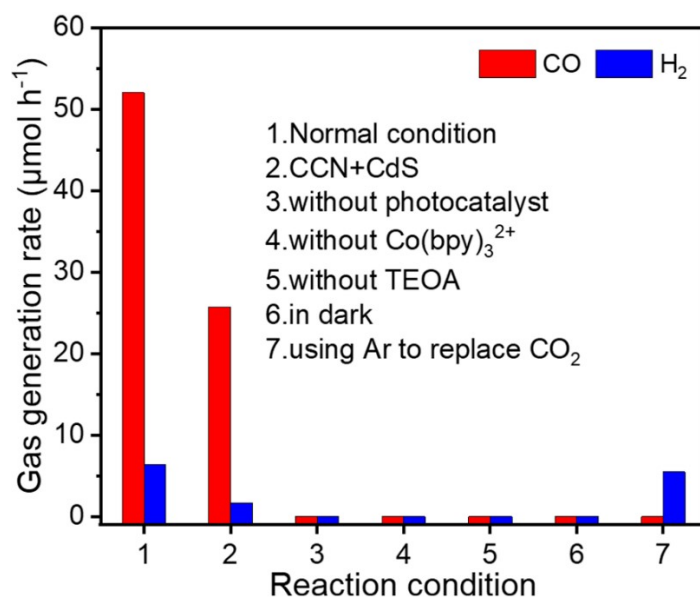

**Fig. S4**  $\text{CO}_2$  photoreduction performance under varied conditions

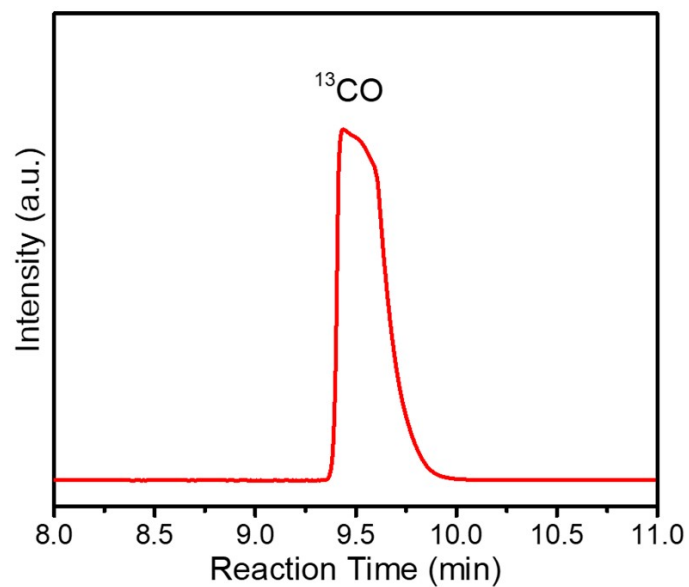

**Fig. S5** GC spectrum of CO produced from  $^{13}\text{CO}_2$  isotope experiment.

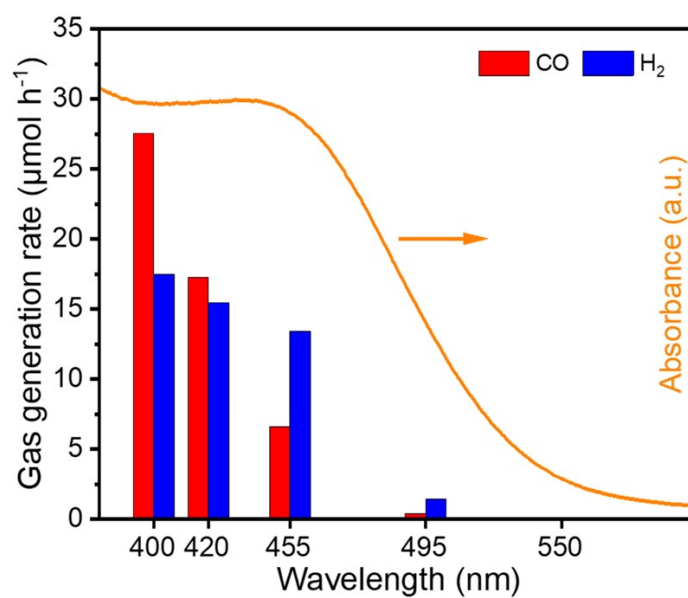

**Fig. S6** Wavelength-dependent  $\text{CO}_2$  reduction performance of CCN/CdS (the different wavelengths were obtained by applying specific long-pass cut-off filters).

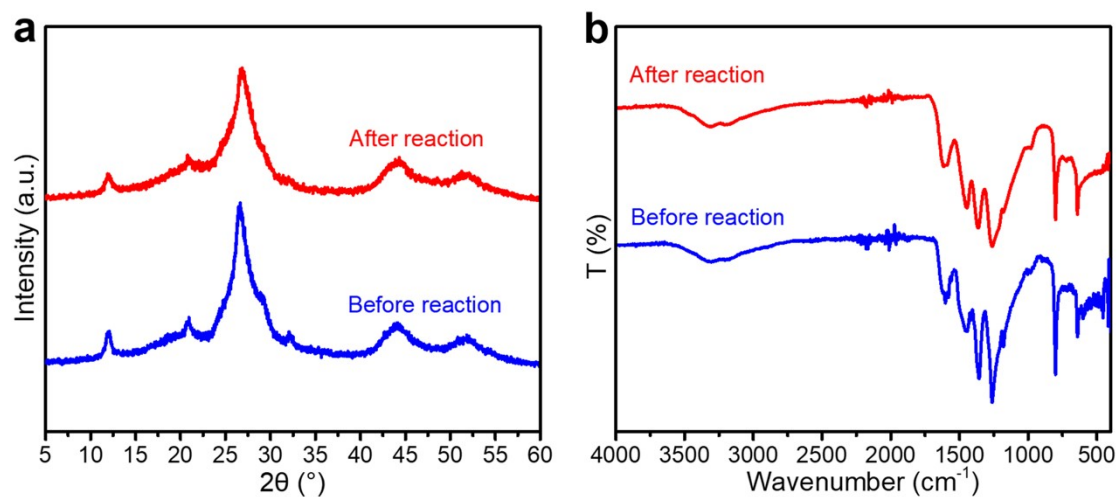

**Fig. S7** (a) XRD patterns and (b) FT-IR spectra of fresh and used CCN/CdS samples.

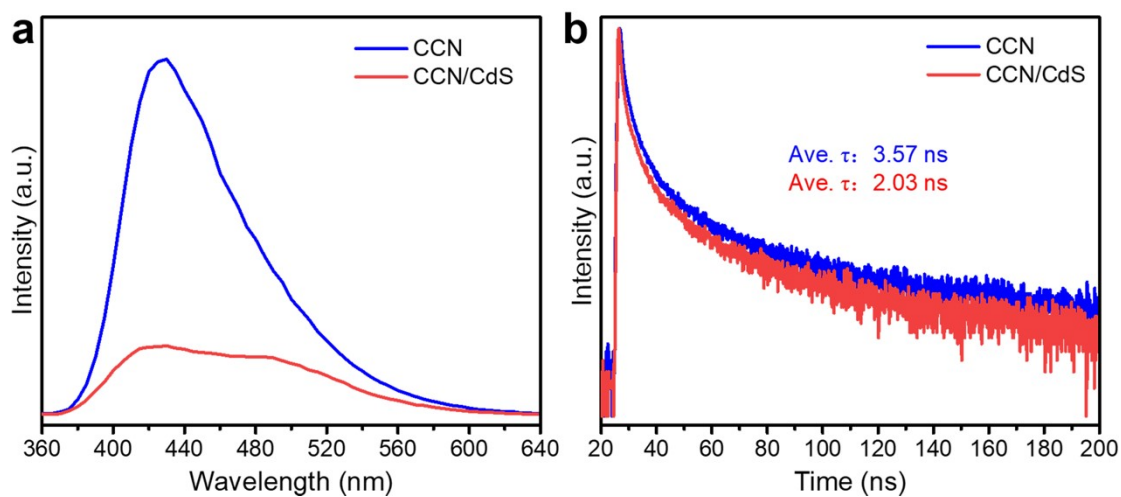

**Fig. S8** (a) PL spectra of CCN and CCN/CdS using 395 nm monochromatic light as the excitation wavelength and (b) TRPL spectra of CCN and CCN/CdS.

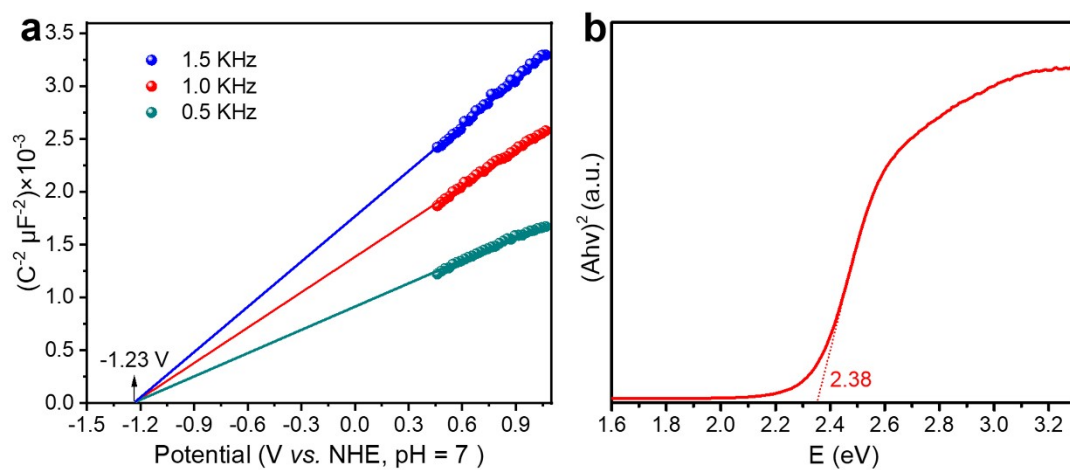

**Fig. S9** (a) Mott-Schottky curves and (b) Tauc plot of CdS NPs.

**Table S1.** The elemental contents of CCN NSs determined by TEM-EDX analysis.

| Element | Atomic fraction (%) |
|---------|---------------------|
| C       | 33.82               |
| N       | 65.44               |
| Cl      | 0.65                |
| O       | 0.07                |
| K       | 0.02                |

**Table S2.** The AQE comparison of CNN/CdS with other catalysts for photocatalytic CO<sub>2</sub>-to-CO reduction.

| Catalyst                                               | Light (nm)      | AQE (%) | Ref.      |
|--------------------------------------------------------|-----------------|---------|-----------|
| CCN/CdS                                                | $\lambda = 420$ | 10.8    | This work |
| Fe <sup>II</sup> (dmp) <sub>2</sub> (NCS) <sub>2</sub> | $\lambda = 436$ | 6.7     | 1         |
| MP-TAP-CVs                                             | $\lambda = 420$ | 4.80    | 2         |
| mpg-C <sub>3</sub> N <sub>4</sub>                      | $\lambda = 400$ | 4.2     | 3         |
| d <sub>5</sub> -PCN-NSs                                | $\lambda = 420$ | 3.80    | 4         |
| N-CP-D                                                 | $\lambda = 420$ | 3.39    | 5         |
| 3DOM CdSQD/NC                                          | $\lambda = 420$ | 2.90    | 6         |
| MPCN                                                   | $\lambda = 420$ | 0.86    | 7         |
| Au(25)@CdS                                             | $\lambda = 420$ | 0.61    | 8         |
| TiO <sub>2</sub> :Rh-LHCII                             | $\lambda = 555$ | 0.04    | 9         |



**Table S3.** Performance comparison of CNN/CdS with other catalysts for photocatalytic CO<sub>2</sub> reduction.

| Catalyst                                       | Light (nm)      | CO Yield ( $\mu\text{mol}$ ) | Ref.      |
|------------------------------------------------|-----------------|------------------------------|-----------|
| CCN/CdS                                        | $\lambda > 300$ | 52.0                         | This work |
| GaN nanowires                                  | $\lambda > 300$ | 47.4                         | 10        |
| BiOI                                           | $\lambda > 300$ | 42.9                         | 11        |
| H-Ga <sub>2</sub> O <sub>3</sub>               | $\lambda > 300$ | 21.0                         | 12        |
| MPCN                                           | $\lambda > 300$ | 7.9                          | 7         |
| g-C <sub>3</sub> N <sub>4</sub> /BiOBr         | $\lambda > 300$ | 6.67                         | 13        |
| TiO <sub>2</sub> :Rh-LHCII                     | $\lambda > 300$ | 2.8                          | 9         |
| TiO <sub>2</sub> particles                     | $\lambda > 320$ | 1.5                          | 14        |
| In <sub>2</sub> Ge <sub>2</sub> O <sub>7</sub> | $\lambda > 300$ | 0.51                         | 15        |

- 1 H. Takeda, K. Ohashi, A. Sekine and O. Ishitani, *J. Am. Chem. Soc.*, 2016, **138**, 4354-4357.
- 2 P. Yang, H. Zhuzhang, R. Wang, W. Lin and X. Wang, *Angew. Chem. Int. Ed.*, 2019, **58**, 1134-1137.
- 3 C. Cometto, R. Kuriki, L. Chen, K. Maeda, T.-C. Lau, O. Ishitani and M. Robert, *J. Am. Chem. Soc.*, 2018, **140**, 7437-7440.
- 4 R. Wang, P. Yang, S. Wang and X. Wang, *J Catal*, 2021, **402**, 166-176.
- 5 S. Wang, X. Hai, X. Ding, S. Jin, Y. Xiang, P. Wang, B. Jiang, F. Ichihara, M. Oshikiri, X. Meng, Y. Li, W. Matsuda, J. Ma, S. Seki, X. Wang, H. Huang, Y. Wada, H. Chen and J. Ye, *Nat. Commun.*, 2020, **11**, 1149.
- 6 F. Wang, T. Hou, X. Zhao, W. Yao, R. Fang, K. Shen and Y. Li, *Adv. Mater.*,

- 2021, **33**, 2102690.
- 7 L. Ye, D. Wu, K.H. Chu, B. Wang, H. Xie, H.Y. Yip and P.K. Wong, *Chem. Eng. J.*, 2016, **304**, 376-383.
  - 8 P. Zhang, S. Wang, B.Y. Guan and X.W. Lou, *Energy Environ. Sci.*, 2019, **12**, 164-168.
  - 9 C.-W. Lee, R. Antoniou Kourounioti, J.C.S. Wu, E. Murchie, M. Maroto-Valer, O.E. Jensen, C.-W. Huang and A. Ruban, *J. CO2 Util.*, 2014, **5**, 33-40.
  - 10 B. AlOtaibi, S. Fan, D. Wang, J. Ye and Z. Mi, *ACS Catal.*, 2015, **5**, 5342-5348.
  - 11 Y. Bai, L. Ye, L. Wang, X. Shi, P. Wang and W. Bai, *Environ. Sci. Nano*, 2016, **3**, 902-909.
  - 12 Y.-X. Pan, Z.-Q. Sun, H.-P. Cong, Y.-L. Men, S. Xin, J. Song and S.-H. Yu, *Nano Res.*, 2016, **9**, 1689-1700.
  - 13 Y. Bai, T. Chen, P. Wang, L. Wang, L. Ye, X. Shi and W. Bai, *Sol. Energy Mater Sol. Cells*, 2016, **157**, 406-414.
  - 14 S. Xie, Y. Wang, Q. Zhang, W. Deng and Y. Wang, *ACS Catal.*, 2014, **4**, 3644-3653.
  - 15 Q. Liu, Y. Zhou, Y. Ma and Z. Zou, *RSC Adv.*, 2012, **2**, 3247-3250.
